# Supplementary material for: Self-assembly of porphyrin on graphene oxide in aqueous medium: fabrication, characterization, and photocatalytic studies
Source: Royal Society of Chemistry journal article supplement (doi:10.1039/c9pp00088g), 2019-06-21
Supplement: c9pp00088g1.pdf [file c9pp00088g1.pdf]

*Supporting Information's*

**Self-assembly of porphyrin on graphene oxide in aqueous medium: fabrication, characterization, and photocatalytic studies**

Nagi El-Shafai,<sup>a,b</sup> Mohamed E. El-Khouly,<sup>\*c,d</sup> Maged El-Kemary,<sup>b</sup> Mohamed Ramadan,<sup>a</sup> Mamdouh Masoud<sup>a</sup>

<sup>a</sup> Department of Chemistry, Faculty of Science, Alexandria University, Egypt

<sup>b</sup> Institute of Nanoscience and Nanotechnology, Kafrelsheikh University, Egypt

<sup>c</sup> Department of Chemistry, Faculty of Science, Kafrelsheikh University, Egypt

<sup>d</sup> Institute of Basic and Applied Sciences, Egypt-Japan Institute of Science and Technology, Alexandria, Egypt

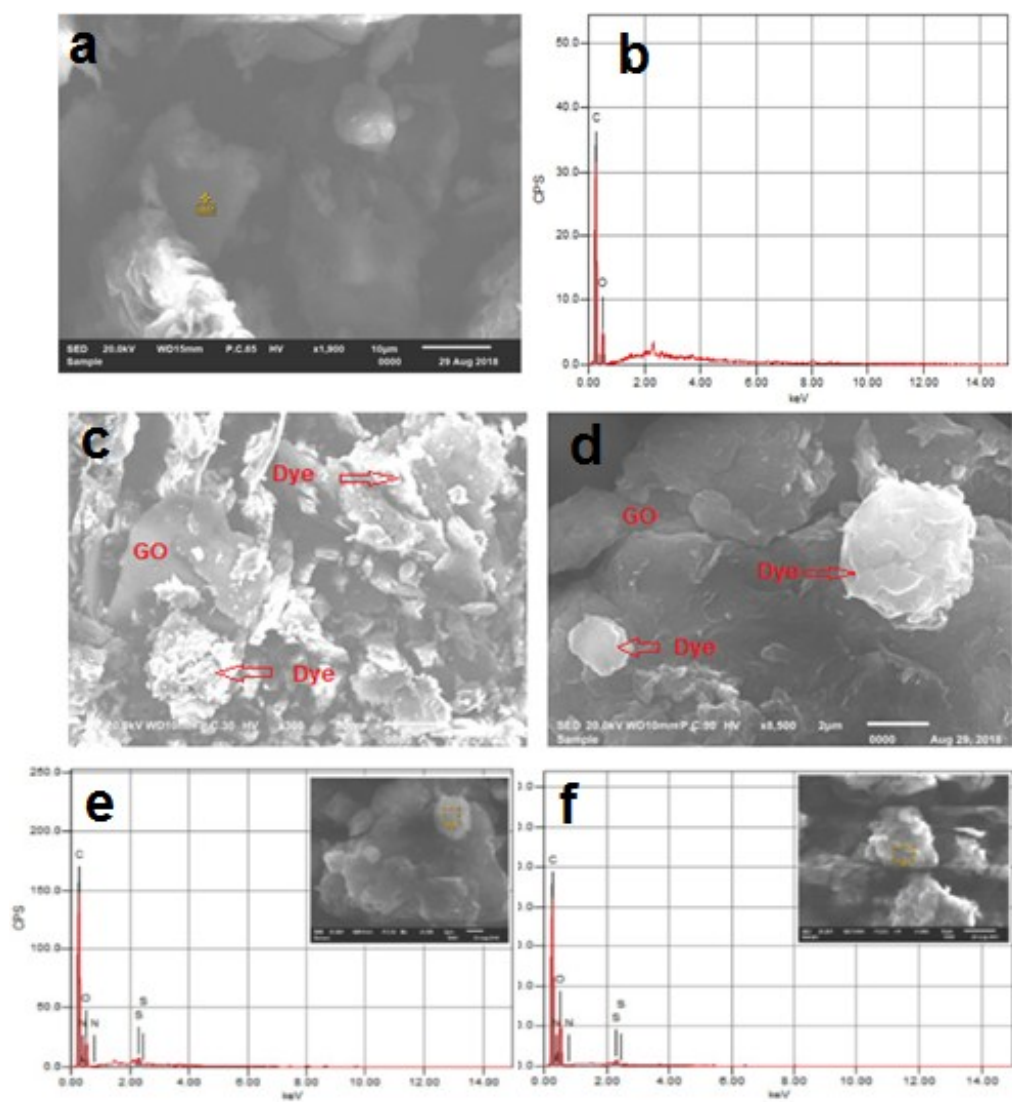

**Fig. S1** SEM image of GO (a) and GO@TMPyP composite (c, d) at different magnification. EDX of GO(b) and GO@TMPyP composite (e, f).

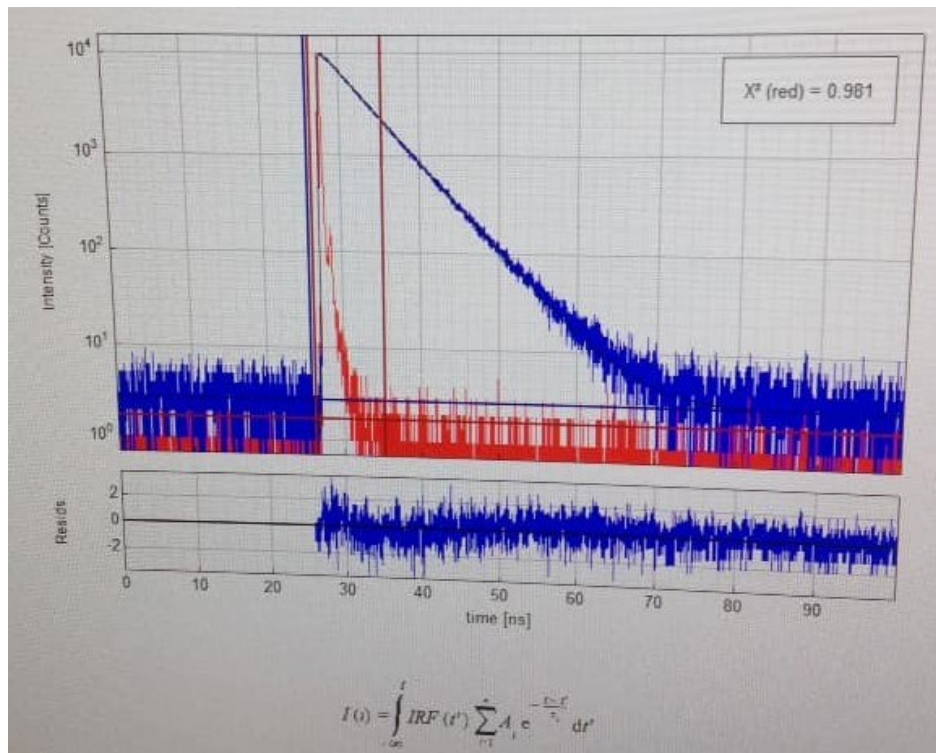

**Fig. S2.** Fluorescence decay profile of TMPyP in water;  $\lambda_{\text{ex}} = 420 \text{ nm}$ ;  $\lambda_{\text{em}} = 710 \text{ nm}$ .

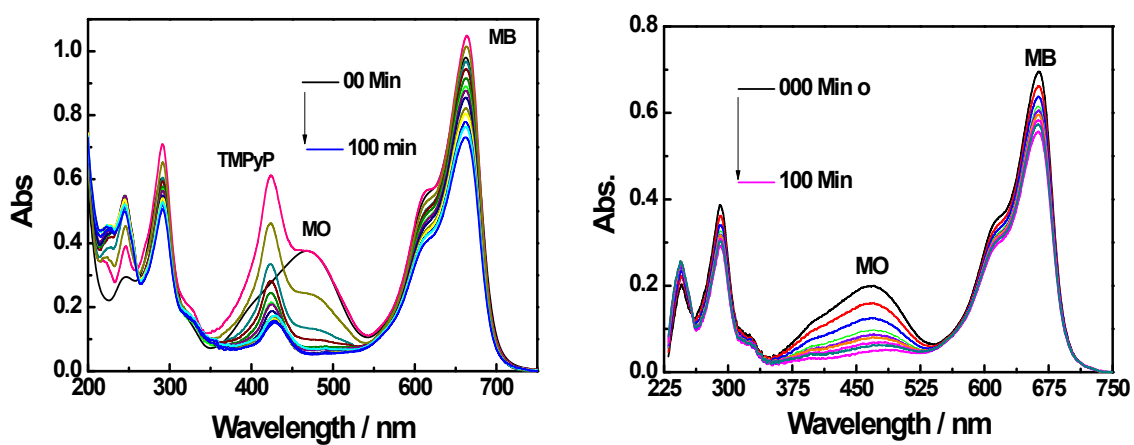

**Figure S3.** (Left) Absorption spectra of mixed dye (MO and MB) in the presence of TMPyP under visible light with different times. (Right) Absorption spectra of mixed dye (MO and MB) under visible light with different times.

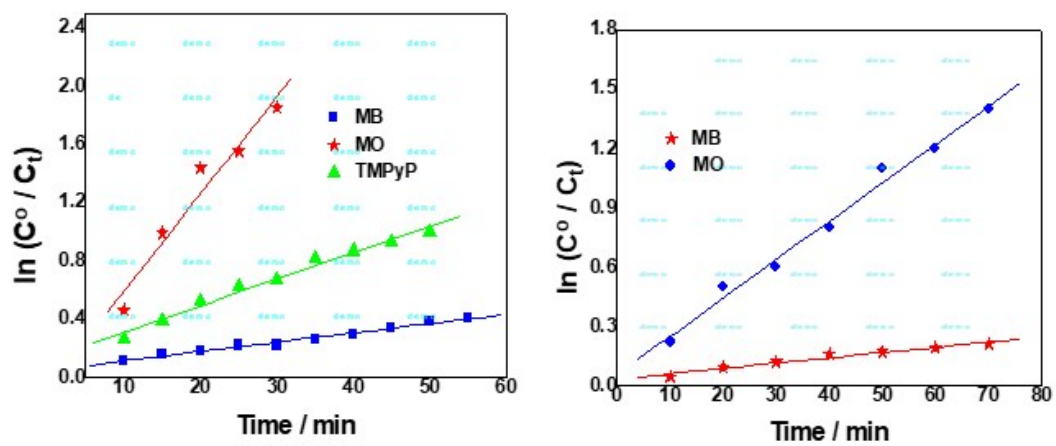

**Figure S4.** (Left) Linear plot of  $\ln(C^0/C_t)$  with irradiation time in water for degradation of mixed MB and MO dyes in the presence of TMPyP. (Right) Linear plot of  $\ln(C^0/C_t)$  with irradiation time in water for degradation of mixed MB and MO dyes under visible light.

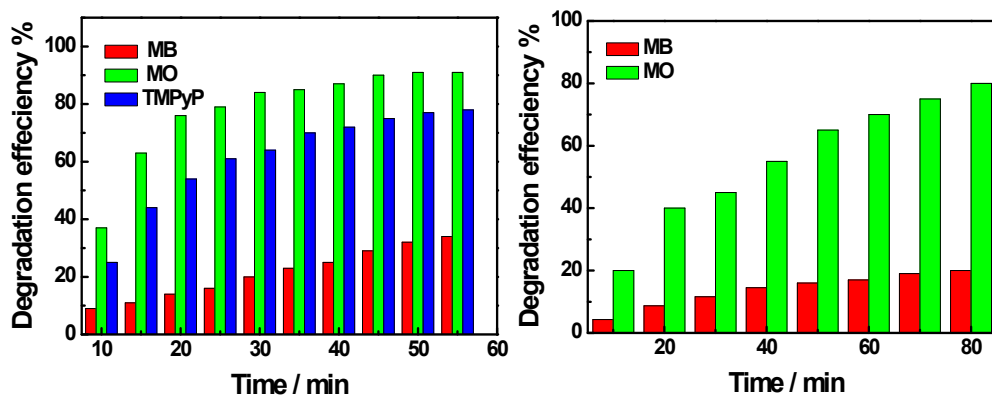

**Figure S5.** (Left) Photodegradation efficiency (%) of mixed MB and MO dyes in the presence of TMPyP under visible light. (Right) Photodegradation efficiency (%) of mixed MB and MO dyes under visible light.
